# Supplementary material for: Converting drugs into gelators: supramolecular hydrogels from N-acetyl-l-cysteine and coinage-metal salts
Source: Royal Society of Chemistry journal article supplement (doi:10.1039/c0ob00311e), 2010-01-01

Electronic Supplementary Information for:

## Converting drugs into gelators: supramolecular hydrogels from *N*-acetyl-L-cysteine and coinage-metal salts

Pablo Casuso, Pedro Carrasco, Iraida Loinaz, Hans J. Grande and Ibon Odriozola\*

*CIDETEC Centre for Electrochemical Technologies, New Materials Department, Paseo Miramón 196, 20009 Donostia-San Sebastián, Spain*

\* To whom correspondence should be addressed. E-mail: [iodriozola@cidetec.es](mailto:iodriozola@cidetec.es)

### Purification of M-NAC hydrogels

**Au-NAC** and **Ag-NAC** hydrogels were dissolved by the addition of NaOH 1N and the resulting solutions were dialysed against ultrapure water for 3 days. Then, the solutions were freeze-dried to give the corresponding compounds as white solids. **Cu-NAC** was unstable to dialysis and it was purified as follows: the gel was diluted in HCl 0.001 N. The resulting suspension was then centrifuged and washed several times with HCl 0.001 N. The product was lyophilised to give **Cu-NAC** as a white solid.

### Energy dispersive X-ray spectroscopy (EDS)

Analyses were performed on an INCA-300 model from OXFORD, operated at an accelerating voltage of 20 kV.

#### Au-NAC

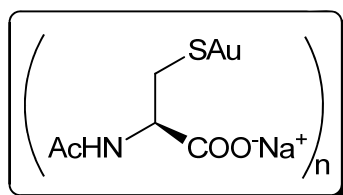

Chemical Formula: C<sub>5</sub>H<sub>7</sub>AuNNaO<sub>3</sub>S

Calculated elemental analysis (%): C, 15.76; H, 1.85; Au, 51.68; N, 3.67; Na, 6.03; O, 12.59; S, 8.41

All results in atomic percent:

|        | C     | N     | O     | Na   | S    | Au   | Total  |
|--------|-------|-------|-------|------|------|------|--------|
| zone 1 | 30.92 | 12.39 | 33.37 | 6.21 | 9.41 | 7.69 | 100.00 |
| zone 2 | 31.80 | 12.94 | 32.89 | 6.19 | 8.98 | 7.20 | 100.00 |
| zone 3 | 30.96 | 14.96 | 34.13 | 6.18 | 7.50 | 6.27 | 100.00 |

|      | C     | N     | O     | Na   | S    | Au   |
|------|-------|-------|-------|------|------|------|
| Max. | 31.80 | 14.96 | 34.13 | 6.21 | 9.41 | 7.69 |
| Min. | 30.92 | 12.39 | 32.89 | 6.18 | 7.50 | 6.27 |

All results in weight percent:

|        | C     | N    | O     | Na   | S    | Au    | Total  |
|--------|-------|------|-------|------|------|-------|--------|
| zone 1 | 12.22 | 5.71 | 17.57 | 4.70 | 9.93 | 49.86 | 100.00 |
| zone 2 | 13.00 | 6.17 | 17.91 | 4.84 | 9.80 | 48.29 | 100.00 |
| zone 3 | 13.55 | 7.63 | 19.89 | 5.17 | 8.76 | 45.00 | 100.00 |

|      | C     | N    | O     | Na   | S    | Au    |
|------|-------|------|-------|------|------|-------|
| Max. | 13.55 | 7.63 | 19.89 | 5.17 | 9.93 | 49.86 |
| Min. | 12.22 | 5.71 | 17.57 | 4.70 | 8.76 | 45.00 |

### Ag-NAC

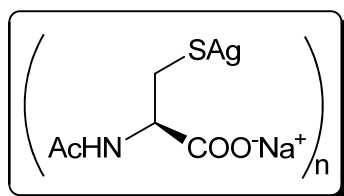

Chemical Formula: C<sub>5</sub>H<sub>7</sub>AgNNaO<sub>3</sub>S

Calculated elemental analysis (%): C, 20.56; H, 2.42; Ag, 36.94; N, 4.80; Na, 7.87; O, 16.44; S, 10.98

All results in atomic percent:

|        | C     | N     | O     | Na   | S    | Ag   | Total  |
|--------|-------|-------|-------|------|------|------|--------|
| zone 1 | 22.29 | 19.70 | 32.84 | 6.75 | 9.10 | 9.31 | 100.00 |
| zone 2 | 23.63 | 21.14 | 34.97 | 7.10 | 6.67 | 6.48 | 100.00 |
| zone 3 | 21.80 | 22.24 | 34.39 | 6.54 | 7.58 | 7.44 | 100.00 |

|      | C     | N     | O     | Na   | S    | Ag   |
|------|-------|-------|-------|------|------|------|
| Max. | 23.63 | 22.24 | 34.97 | 7.10 | 9.10 | 9.31 |
| Min. | 21.80 | 19.70 | 32.84 | 6.54 | 6.67 | 6.48 |

All results in weight percent:

|        | C     | N     | O     | Na   | S     | Ag    | Total  |
|--------|-------|-------|-------|------|-------|-------|--------|
| zone 1 | 10.62 | 10.95 | 20.85 | 6.16 | 11.58 | 39.84 | 100.00 |
| zone 2 | 12.81 | 13.36 | 25.25 | 7.37 | 9.65  | 31.56 | 100.00 |
| zone 3 | 11.29 | 13.43 | 23.72 | 6.49 | 10.48 | 34.60 | 100.00 |

|      | C     | N     | O     | Na   | S     | Ag    |
|------|-------|-------|-------|------|-------|-------|
| Max. | 12.81 | 13.43 | 25.25 | 7.37 | 11.58 | 39.84 |
| Min. | 10.62 | 10.95 | 20.85 | 6.16 | 9.65  | 31.56 |

### Cu-NAC

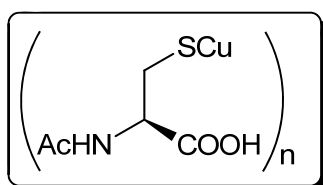

Chemical Formula:  $C_5H_8CuNO_3S$

Calculated elemental analysis (%): C, 26.60; H, 3.57; Cu, 28.15; N, 6.20; O, 21.26; S, 14.20

All results in atomic percent:

|        | C     | N     | O     | S    | Cu   | Total  |
|--------|-------|-------|-------|------|------|--------|
| zone 1 | 32.15 | 9.84  | 41.02 | 7.95 | 9.04 | 100.00 |
| zone 2 | 31.38 | 12.70 | 37.25 | 8.98 | 9.68 | 100.00 |
| zone 3 | 31.79 | 10.54 | 42.66 | 7.71 | 7.31 | 100.00 |

|      | C     | N     | O     | S    | Cu   |
|------|-------|-------|-------|------|------|
| Max. | 32.15 | 12.70 | 42.66 | 8.98 | 9.68 |
| Min. | 31.38 | 9.84  | 37.25 | 7.71 | 7.31 |

All results in weight percent:

|        | C     | N    | O     | S     | Cu    | Total  |
|--------|-------|------|-------|-------|-------|--------|
| zone 1 | 19.21 | 6.86 | 32.66 | 12.68 | 28.59 | 100.00 |
| zone 2 | 18.35 | 8.66 | 29.02 | 14.01 | 29.95 | 100.00 |
| zone 3 | 19.85 | 7.67 | 35.48 | 12.84 | 24.15 | 100.00 |

|      | C     | N    | O     | S     | Cu    |
|------|-------|------|-------|-------|-------|
| Max. | 19.85 | 8.66 | 35.48 | 14.01 | 29.95 |
| Min. | 18.35 | 6.86 | 29.02 | 12.68 | 24.15 |

## FT-IR Spectra

Fourier Transformed Infra-Red Spectroscopy (FT-IR) spectra were taken from a Nicolet Avatar 360 apparatus. All samples were measured in KBr disks.

### Au-NAC

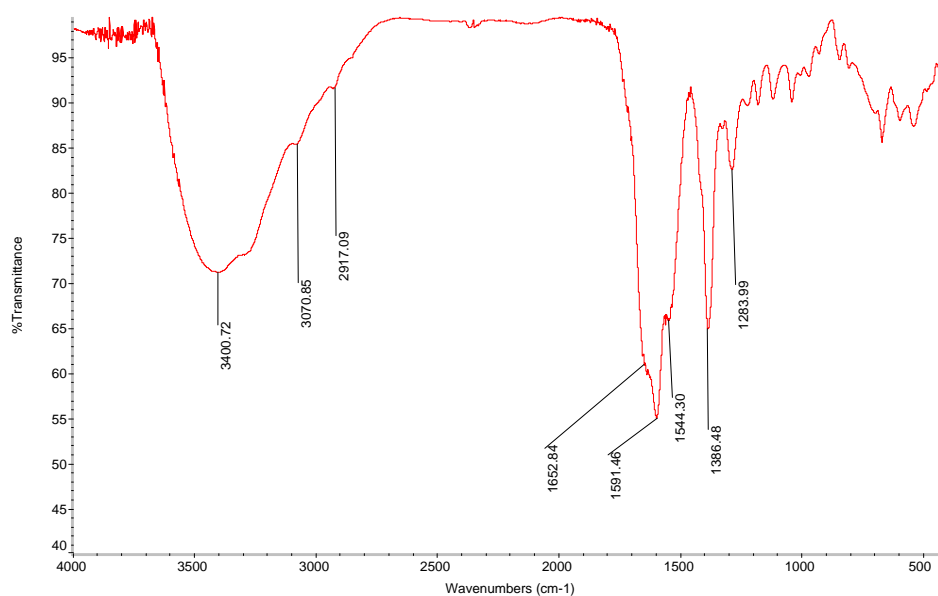

### Ag-NAC

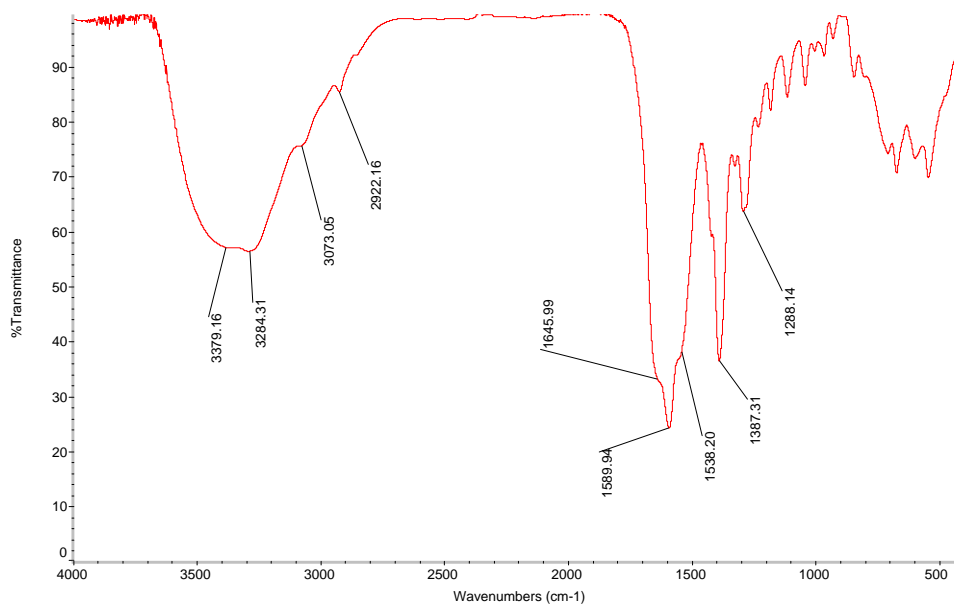

## Cu-NAC

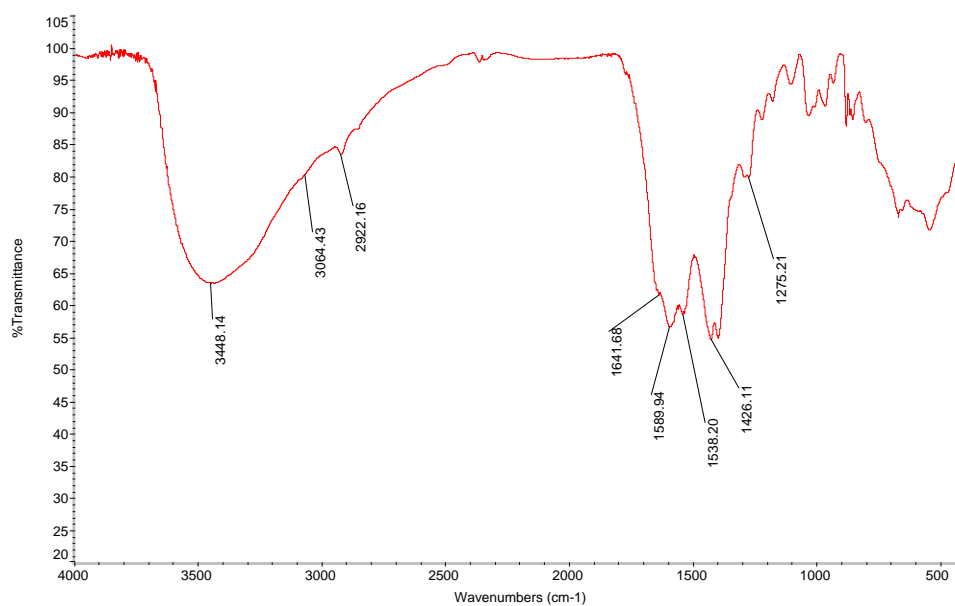

## <sup>1</sup>H NMR Spectra

Proton nuclear magnetic resonance (<sup>1</sup>H NMR) experiments were performed on a Bruker AVANCE III spectrometer at 500 MHz. All samples were measured at room temperature in D<sub>2</sub>O.

## Au-NAC

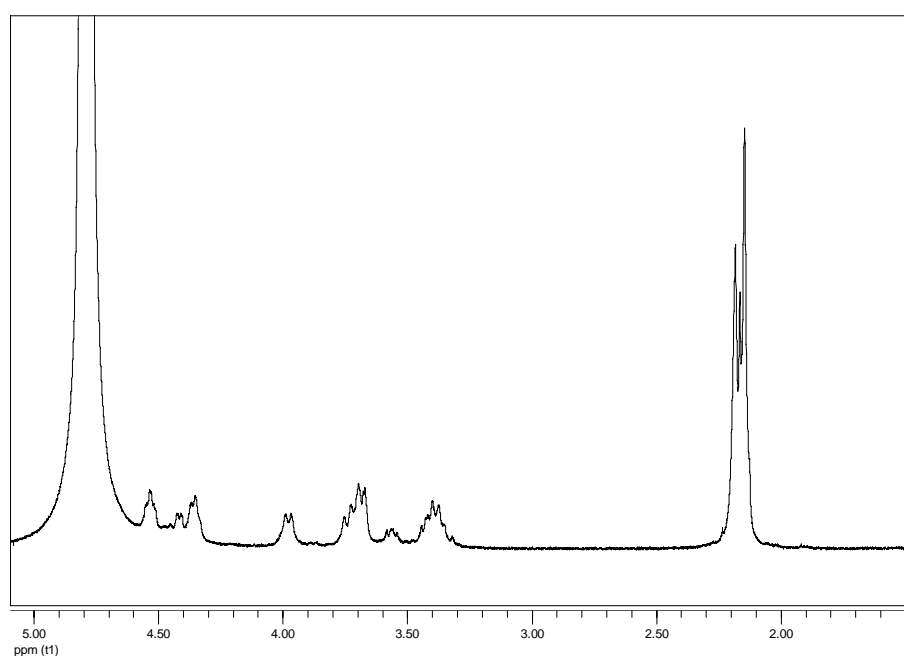

### Ag-NAC

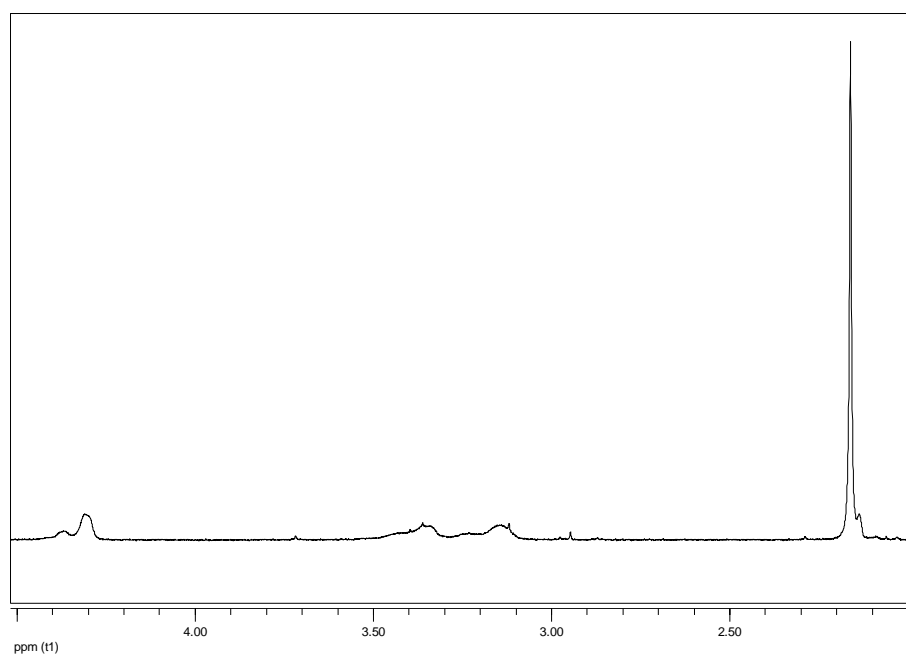

### Cu-NAC

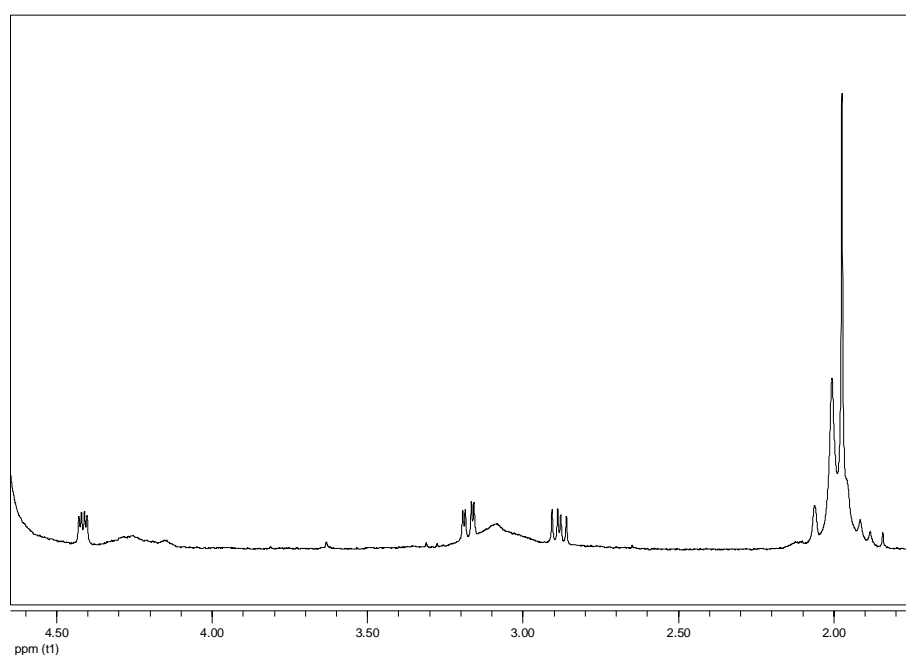

## TGA Spectra

Thermogravimetric analyses (TGA) were performed on a Q500 apparatus from TA Instruments. The analyses were run under nitrogen, from room-temperature to 1000 °C at a rate of 10 °C min<sup>-1</sup>.

### Au-NAC

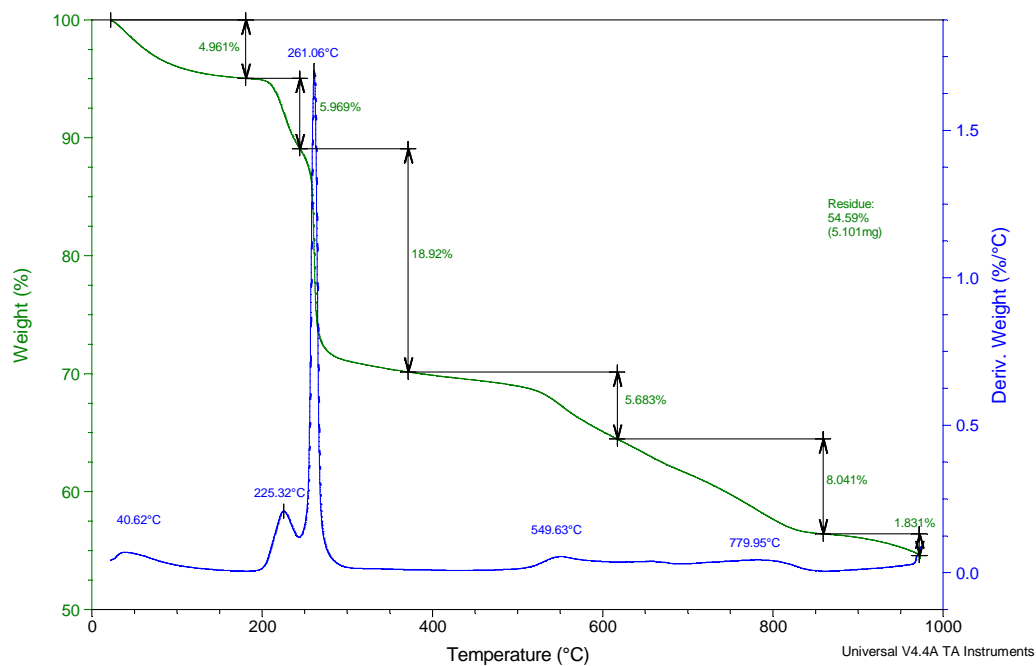

### Ag-NAC

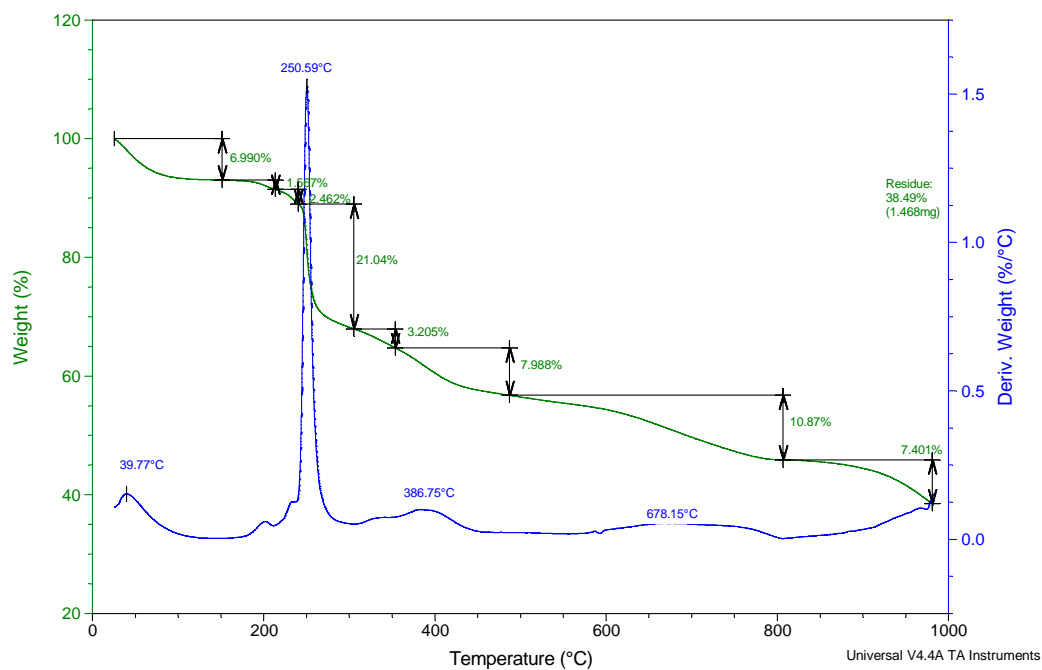

### Cu-NAC

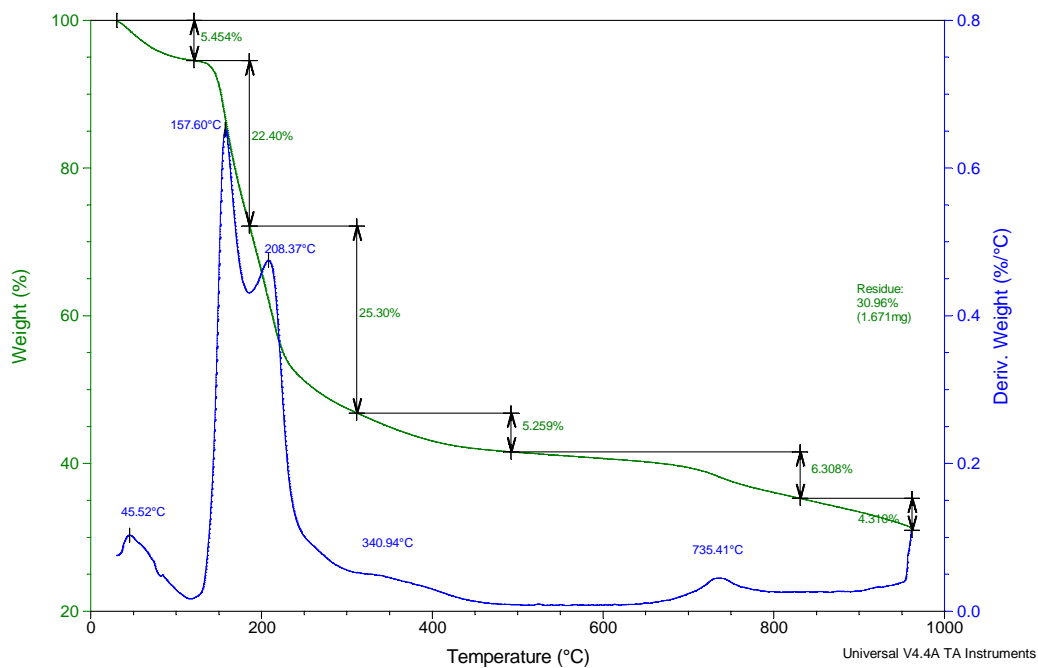

### N-acetyl-L-cysteine

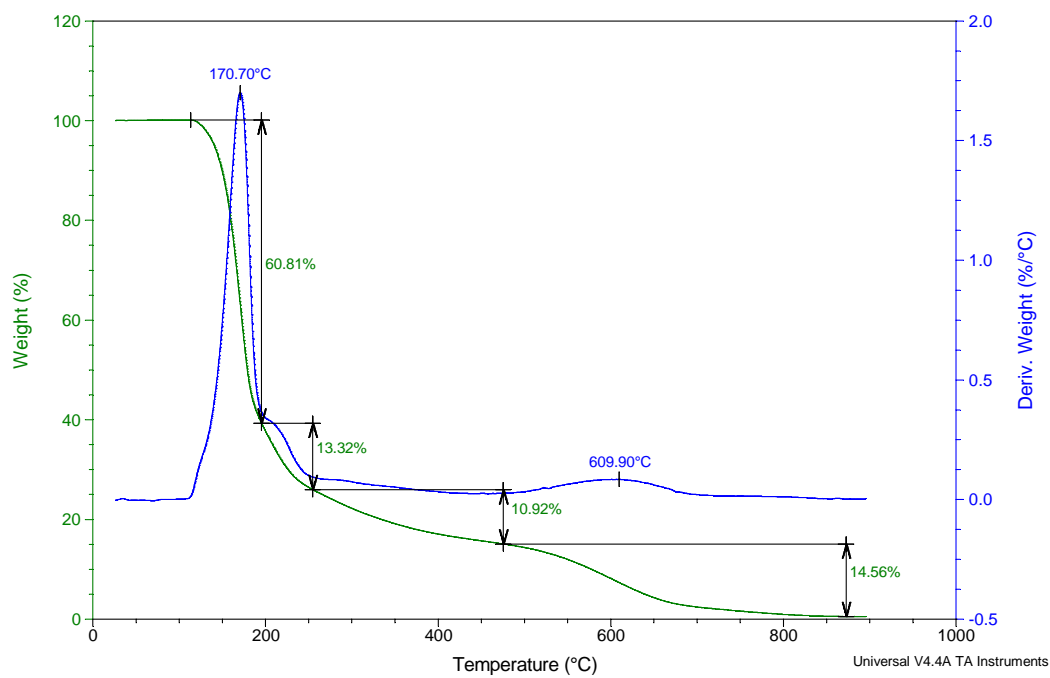



## UV-vis Spectra

Spectra were acquired on a JASCO V-570 spectrophotometer at room temperature.

### Ag-NAC

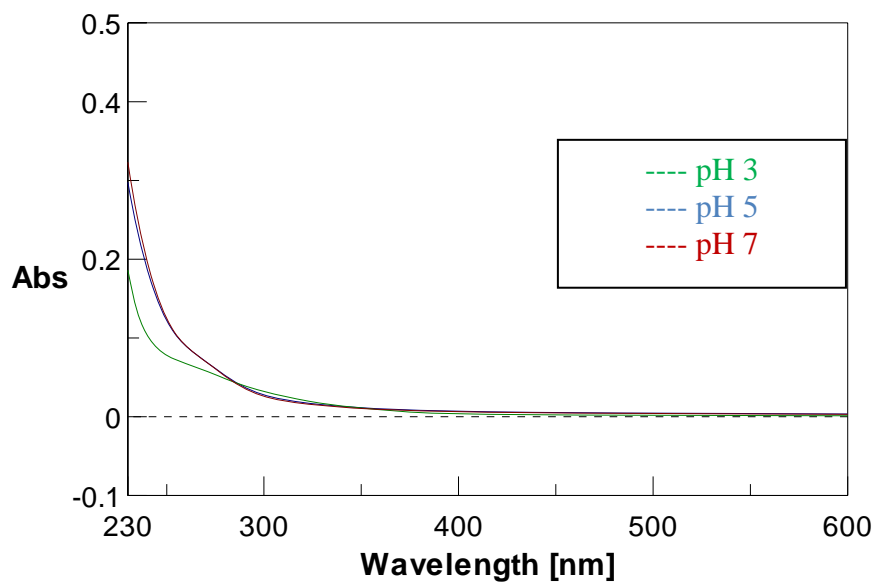

### Cu-NAC

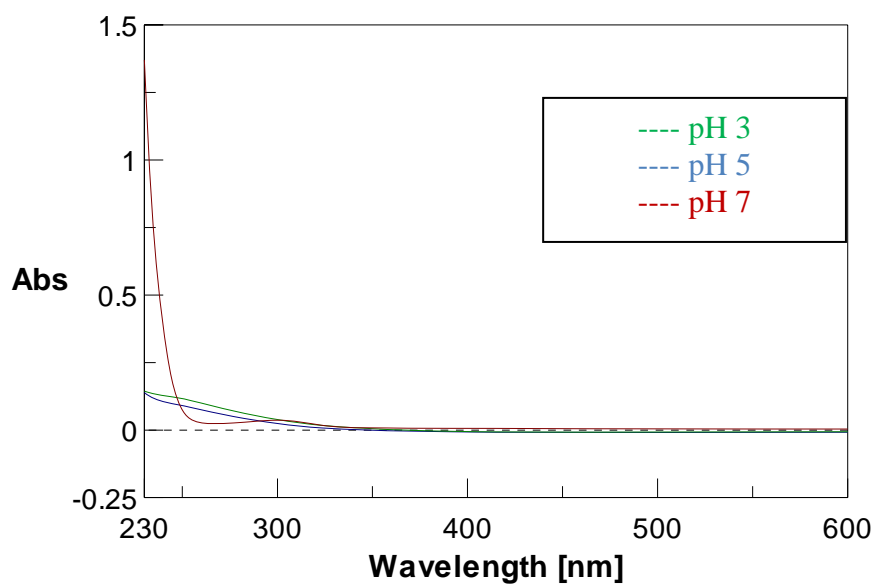

Supplement: c0ob00311e.pdf [file c0ob00311e.pdf]
